# Supplementary material for: Periodontitis is an independent risk indicator for atherosclerotic cardiovascular diseases among 60 174 participants in a large dental school in the Netherlands
Source: PubMed Central journal article supplement — J Epidemiol Community Health. 2016 Aug 8;71(1):37–42. doi: 10.1136/jech-2015-206745 (PMC5256268; doi:10.1136/jech-2015-206745), 2016-08-08
Supplement: jech-2015-206745supp_tables.pdf [file jech-2015-206745supp_tables.pdf]

**Table S1.** Univariate and multivariate logistic regression analyses of risk variables for association with MI

|                       | <b>All</b><br><i>(n = 60,174)</i> |                                 | <b>≤65 years</b><br><i>(n = 53,075)</i> |                                 | <b>Male</b><br><i>(n = 27,591)</i> |                                 |
|-----------------------|-----------------------------------|---------------------------------|-----------------------------------------|---------------------------------|------------------------------------|---------------------------------|
|                       | <b>Univariate</b>                 | <b>Multivariate<sup>a</sup></b> | <b>Univariate</b>                       | <b>Multivariate<sup>b</sup></b> | <b>Univariate</b>                  | <b>Multivariate<sup>c</sup></b> |
|                       | <b>OR (95% CI)</b>                | <b>OR (95% CI)</b>              | <b>OR (95% CI)</b>                      | <b>OR (95% CI)</b>              | <b>OR (95% CI)</b>                 | <b>OR (95% CI)</b>              |
| <b>Periodontitis</b>  | 2.56 (2.18–3.01)                  | 1.60 (1.33–1.92)                | 2.96 (2.47–3.55)                        | 1.52 (1.25–1.86)                | 2.68 (2.23–3.24)                   | 1.80 (1.46–2.22)                |
| Age at intake (years) | 1.05 (1.04–1.06)                  | 1.05 (1.05–1.06)                | n.a.                                    | n.a.                            | 1.05 (1.05–1.06)                   | 1.05 (1.04–1.06)                |
| Male sex              | 3.30 (2.78–3.92)                  | 3.16 (2.64–3.78)                | 3.50 (2.86–4.28)                        | 3.32 (2.69–4.10)                | n.a.                               | n.a.                            |
| Smoking               | 4.63 (3.90–5.51)                  | 3.17 (2.61–3.85)                | 5.81 (4.82–7.01)                        | 3.10 (2.53–3.80)                | 3.74 (3.06–4.58)                   | 2.86 (2.28–3.59)                |
| Diabetes mellitus     | 12.88 (10.73–14.72)               | 2.46 (1.98–3.06)                | 14.71 (11.98–18.05)                     | 2.87 (2.23–3.69)                | 11.37 (9.20–14.06)                 | 2.50 (1.93–3.23)                |
| Hypertension          | 12.56 (10.73–14.72)               | 3.70 (3.05–4.50)                | 13.34 (11.11–16.00)                     | 4.23 (3.38–5.30)                | 12.14 (10.05–14.67)                | 3.33 (2.65–4.20)                |
| Hypercholesterolemia  | 21.84 (18.45–25.86)               | 5.42 (4.40–6.67)                | 24.42 (20.15–29.58)                     | 6.09 (4.79–7.73)                | 21.20 (17.35–25.90)                | 5.90 (4.63–7.52)                |
| Low SES               | 1.07 (0.92–1.25)                  | 0.99 (0.84–1.16)                | 1.07 (0.90–1.27)                        | 0.87 (0.72–1.05)                | 1.00 (0.84–1.19)                   | 0.97 (0.80–1.18)                |

For multivariate analyses all variables were included in the model

<sup>a, b, c</sup> Due to incomplete data for sex and SES, the number of cases included in multivariate analyses were  $n = 59,352$ ,  $n = 52,335$ ,  $n = 27,210$  respectively

MI, myocardial infarction; SES, social economic status; n.a., not applicable

**Table S2.** Univariate and multivariate logistic regression analyses of risk variables for association with CVA

|                       | <b>All</b><br><i>(n = 60,174 )</i> |                                 | <b>≤65 years</b><br><i>(n = 53,075)</i> |                                 | <b>Male</b><br><i>(n = 27,591)</i> |                                 |
|-----------------------|------------------------------------|---------------------------------|-----------------------------------------|---------------------------------|------------------------------------|---------------------------------|
|                       | <b>Univariate</b>                  | <b>Multivariate<sup>a</sup></b> | <b>Univariate</b>                       | <b>Multivariate<sup>b</sup></b> | <b>Univariate</b>                  | <b>Multivariate<sup>c</sup></b> |
|                       | <b>OR (95% CI)</b>                 | <b>OR (95% CI)</b>              | <b>OR (95% CI)</b>                      | <b>OR (95% CI)</b>              | <b>OR (95% CI)</b>                 | <b>OR (95% CI)</b>              |
| <b>Periodontitis</b>  | 2.54 (2.08–3.10)                   | 1.55 (1.25–1.92)                | 2.65 (2.12–3.31)                        | 1.36 (1.07–1.72)                | 2.16 (1.63–2.85)                   | 1.38 (1.02–1.87)                |
| Age at intake (years) | 1.05 (1.04–1.05)                   | 1.04 (1.03–1.05)                | n.a.                                    | n.a.                            | 1.06 (1.05–1.07)                   | 1.05 (1.04–1.07)                |
| Male sex              | 1.32 (1.10–1.59)                   | 1.18 (0.98–1.44)                | 1.19 (0.96–1.48)                        | 1.05 (0.84 – 1.31)              | n.a.                               | n.a.                            |
| Smoking               | 4.20 (3.38–5.21)                   | 2.74 (2.16–3.47)                | 4.89 (3.88–6.18)                        | 2.64 (2.05–3.39)                | 3.32 (2.47–4.46)                   | 2.42 (1.75–3.35)                |
| Diabetes mellitus     | 10.28 (8.18–12.92)                 | 1.85 (1.42–2.42)                | 10.97 (8.44–14.26)                      | 1.91 (1.40–2.61)                | 8.50 (6.21–11.61)                  | 1.70 (1.18–2.44)                |
| Hypertension          | 16.40 (13.57–19.81)                | 6.16 (4.89–7.76)                | 17.01 (13.69–21.13)                     | 7.02 (5.37–9.16)                | 16.40 (12.63–21.29)                | 6.33 (4.62–8.68)                |
| Hypercholesterolemia  | 16.73 (13.56–20.65)                | 3.49 (2.70–4.49)                | 18.60 (14.66–23.61)                     | 4.04 (3.01–5.43)                | 14.28 (10.69–19.08)                | 3.12 (2.20–4.41)                |
| Low SES               | 1.08 (0.89–1.30)                   | 1.02 (0.84–1.23)                | 1.16 (0.93–1.43)                        | 1.01 (0.81–1.26)                | 0.98 (0.76–1.27)                   | 1.00 (0.79–1.30)                |

For multivariate analyses all variables were included in the model

<sup>a, b, c</sup> Due to incomplete data for sex and SES, the number of cases included in multivariate analyses were n = 59,352, n = 52,335, n = 27,210 respectively

CVA, cerebrovascular accident; SES, social economic status; n.a., not applicable

**Table S3.** Univariate and multivariate logistic regression analyses of risk variables for association with AP

|                       | <b>All</b><br><i>(n = 60,174)</i> |                                 | <b>≤65 years</b><br><i>(n = 53,075)</i> |                                 | <b>Male</b><br><i>(n = 27,591)</i> |                                 |
|-----------------------|-----------------------------------|---------------------------------|-----------------------------------------|---------------------------------|------------------------------------|---------------------------------|
|                       | <b>Univariate</b>                 | <b>Multivariate<sup>a</sup></b> | <b>Univariate</b>                       | <b>Multivariate<sup>b</sup></b> | <b>Univariate</b>                  | <b>Multivariate<sup>c</sup></b> |
|                       | <b>OR (95% CI)</b>                | <b>OR (95% CI)</b>              | <b>OR (95% CI)</b>                      | <b>OR (95% CI)</b>              | <b>OR (95% CI)</b>                 | <b>OR (95% CI)</b>              |
| <b>Periodontitis</b>  | 2.05 (1.68–2.49)                  | 1.21 (0.97–1.49)                | 2.25 (1.82–2.78)                        | 1.12 (0.89–1.40)                | 1.84 (1.40–2.42)                   | 1.12 (0.83–1.52)                |
| Age at intake (years) | 1.04 (1.04–1.05)                  | 1.04 (1.03–1.05)                | n.a.                                    | n.a.                            | 1.05 (1.04–1.06)                   | 1.05 (1.03–1.06)                |
| Male sex              | 1.24 (1.04–1.48)                  | 1.11 (0.93–1.34)                | 1.18 (0.97–1.44)                        | 1.05 (0.86–1.29)                | n.a.                               | n.a.                            |
| Smoking               | 3.36 (2.71–4.17)                  | 2.19 (1.73–2.77)                | 3.93 (3.13–4.93)                        | 2.16 (1.69–2.76)                | 2.70 (2.01–3.65)                   | 1.87 (1.34–2.59)                |
| Diabetes mellitus     | 14.38 (11.76–17.59)               | 2.91 (2.29–3.71)                | 16.24 (12.98–20.31)                     | 3.19 (2.43–4.19)                | 15.90 (12.18–20.75)                | 3.83 (2.79–5.27)                |
| Hypertension          | 17.00 (14.21–20.33)               | 6.84 (5.50–8.52)                | 19.33 (15.82–23.62)                     | 8.84 (6.92–11.30)               | 16.25 (12.65–20.88)                | 5.51 (4.05–7.49)                |
| Hypercholesterolemia  | 14.60 (11.89–17.92)               | 2.60 (2.03–3.32)                | 15.56 (12.37–19.57)                     | 2.53 (1.92–3.35)                | 14.94 (11.33–19.69)                | 2.83 (2.02–3.95)                |
| Low SES               | 1.63 (1.36–1.95)                  | 1.54 (1.28–1.86)                | 1.68 (1.37–2.05)                        | 1.47 (1.19–1.81)                | 1.49 (1.16–1.92)                   | 1.12 (0.83–1.52)                |

For multivariate analyses all variables were included in the model

<sup>a, b, c</sup> Due to incomplete data for sex and SES, the number of cases included in multivariate analyses were  $n = 59,352$ ,  $n = 52,335$ ,  $n = 27,210$  respectively

AP, angina pectoris; SES, social economic status; n.a., not applicable
